# Supplementary material for: Characterization of Physicochemical, Biocompatible Properties and Investigation on Repair Mechanism of Three Typical ECM Meshes in Vitro and in Vivo
Source: Research Square preprint supplement (doi:10.21203/rs.3.rs-7324829/v1), 2025-08-18
Supplement: Supplementary file 1 [file 75ab730d30bc2573a8aae8d1.docx]

| mesh class | Implantation cycle（week） | Score | Tissue reactivity |
| --- | --- | --- | --- |
| PAD | 1 | 4.0 | Mild irritation |
| 4 | 8.3 | Mild irritation |
| 13 | 11.4 | Moderate stimulation |
| 26 | 9.3 | Moderate stimulation |
| HAD | 1 | 1.7 | No irritation or very mild irritation |
| 4 | 6.3 | Mild irritation |
| 13 | 2.4 | No irritation or very mild irritation |
| 26 | 3.7 | Mild irritation |
| SIS | 1 | 3.0 | Mild irritation |
| 4 | 7.0 | Mild irritation |
| 13 | 9.0 | Moderate stimulation |
| 26 | 10.0 | Moderate stimulation |
| Composite | 1 | 2.7 | No irritation or very mild irritation |
| 4 | 4.3 | Mild irritation |
| 13 | 8.3 | Mild irritation |
| 26 | 10.3 | Moderate stimulation |

Table. S1. Local tissue reaction and degradation of ECM meshes

Table. S2. Scoring results of adhesion of different ECM meshes

| Group |  | Male |  |  | Female |  |
| --- | --- | --- | --- | --- | --- | --- |
| Adhesion Strength | Adhesion area | Evaluation | Adhesion Strength | Adhesion area | Evaluation |
| HAD | 0.8±1.2 | 0.7±1.0 | Medium | 1.0±1.0 | 1.0±1.0 | Medium |
| PAD | 1.8±1.3 | 1.8±1.3 | Medium | 1.6±1.1 | 1.4±1.1 | Medium |
| SIS | 1.7±1.5 | 1.7±1.5 | Medium | 1.3±1.5 | 1.3±1.5 | Medium |
| Composite | 1.2±0.9 | 1.5±1.4 | Medium | 1.5±1.3 | 1.5±1.3 | Medium |

Table. S3. Statistical assay of differential metabolites in serum samples in different groups

| MS2 name | MEAN NC | MEAN T1 | MEAN T2 | MEAN T3 | MEAN T4 | P-VALUE |
| --- | --- | --- | --- | --- | --- | --- |
| D-Phenylalanine | 2.15 | 2.05 | 1.86 | 1.87 | 1.88 | 0.03 |
| Thiamine | 0.43 | 0.41 | 0.36 | 0.46 | 0.40 | 0.04 |
| PC(16:0/16:0) | 5.56 | 7.84 | 6.16 | 7.51 | 7.93 | 0.05 |
| Bis-Tris | 1.66 | 1.84 | 0.88 | 0.86 | 0.91 | 0.02 |
| L-Tyrosine | 0.17 | 0.15 | 0.13 | 0.13 | 0.14 | 0.02 |
| N-Acetyl-L-histidine (monohydrate) | 0.01 | 0.01 | 0.01 | 0.01 | 0.01 | 0.04 |
| N-Methylsalsolinol | 0.28 | 0.27 | 0.28 | 0.31 | 0.27 | 0.00 |
| Morusin | 0.05 | 0.08 | 0.05 | 0.03 | 0.07 | 0.03 |
| Racemethionine | 0.58 | 0.56 | 0.48 | 0.52 | 0.50 | 0.02 |
| Acrylodan | 0.31 | 0.42 | 0.23 | 0.53 | 0.40 | 0.04 |
| (+/-)-1-Acetoxy-1-ethoxyethane | 0.35 | 0.46 | 0.39 | 0.24 | 0.42 | 0.01 |
| D-Aspartic acid | 0.03 | 0.03 | 0.02 | 0.03 | 0.03 | 0.03 |
| Calabaxanthone | 0.01 | 0.01 | 0.00 | 0.01 | 0.01 | 0.04 |
| Isopropyl formate | 0.39 | 0.49 | 0.40 | 0.25 | 0.44 | 0.02 |
| Propionic acid | 0.08 | 0.07 | 0.08 | 0.08 | 0.08 | 0.03 |
| Coproporphyrin Ⅲ | 0.02 | 0.03 | 0.02 | 0.01 | 0.03 | 0.01 |
| Arachidonic Acid (peroxide free) | 7.63 | 7.19 | 6.56 | 9.38 | 9.57 | 0.05 |
| PC(20:2(11Z,14Z)/15:0) | 1.62 | 2.43 | 2.03 | 1.95 | 1.93 | 0.03 |
| Glycolic acid | 0.02 | 0.03 | 0.02 | 0.02 | 0.02 | 0.04 |
| 9,10-Epoxyoctadecenoic acid | 0.38 | 0.69 | 0.47 | 0.39 | 0.49 | 0.01 |
| 2-(Ethylamino)-4,5-dihydroxybenzamide | 0.06 | 0.06 | 0.04 | 0.04 | 0.05 | 0.04 |
| N1-(2-Methoxy-4-methylbenzyl)-n2-(2-(pyridin-2-yl) ethyl)oxalamide | 0.07 | 0.10 | 0.06 | 0.04 | 0.10 | 0.03 |
| Cinnamyl phenylacetate | 0.88 | 1.29 | 0.99 | 0.58 | 1.20 | 0.02 |
| Methylsyringin | 0.02 | 0.02 | 0.01 | 0.01 | 0.02 | 0.02 |
| Dihydrocortisol | 0.01 | 0.03 | 0.02 | 0.02 | 0.03 | 0.01 |
| Parakmerin A | 0.47 | 0.70 | 0.59 | 0.30 | 0.66 | 0.04 |
| SN-38 | 0.01 | 0.01 | 0.00 | 0.00 | 0.01 | 0.03 |
| 12-Tridecene-4,6,8,10-tetraynal | 2.24 | 2.86 | 1.88 | 3.66 | 2.77 | 0.03 |
| Kuwanon A | 0.03 | 0.04 | 0.01 | 0.02 | 0.03 | 0.00 |
| Nervonic acid | 0.12 | 0.22 | 0.26 | 0.28 | 0.29 | 0.03 |
| Monomethyl phthalate | 0.30 | 0.43 | 0.27 | 0.58 | 0.45 | 0.03 |
| N-Acetyl-beta-alanine | 0.01 | 0.01 | 0.01 | 0.01 | 0.01 | 0.03 |
| Cinnatriacetin A | 0.09 | 0.14 | 0.09 | 0.05 | 0.12 | 0.02 |

Table. S4. Pathways of differential metabolites between NC group and each ECM group

| Group | Metabolites Pathway |
| --- | --- |
| NC VS Composite | Cysteine and methionine metabolism,  Glycine, serine and threonine metabolism, Aminoacyl-tRNA biosynthesis |
| NC VS PAD | Phenylalanine, tyrosine and tryptophan biosynthesis |
| NC VS HAD | Phenylalanine, tyrosine and tryptophan biosynthesis，  Phenylalanine metabolism |

Table. S5. Pathways of differential metabolites between Composite group and each ECM group

| Group | Metabolites Pathway |
| --- | --- |
| Composite vs PAD | Starch and sucrose metabolism  Synthesis and degradation metabolic pathways of ketone bodies |
| Composite vs HAD | Taurine and Hypotaurine Metabolic |
| Composite vs SIS | Sphingolipid metabolism |
